# Supplementary material for: User-Friendly Integration of Virtual Objects into Image Sequences with Mosaics
Source: Royal Society of Chemistry journal article supplement (doi:10.1039/c8ra09128e), 2003-01-01
Supplement: c8ra09128e1.pdf [file c8ra09128e1.pdf]

Supporting Information (SI)

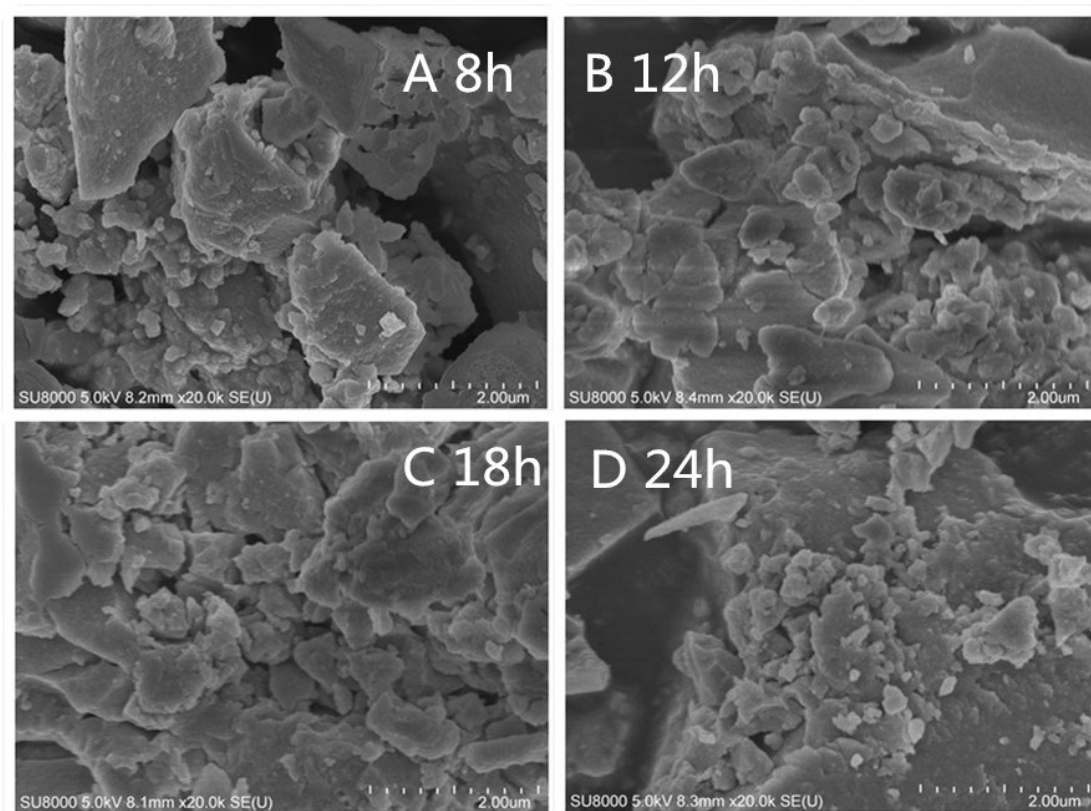

**Figure S1.** SEM image of (A) NiWO<sub>4</sub>-8h, (B) NiWO<sub>4</sub>-12h, (C) NiWO<sub>4</sub>-18h and (D) NiWO<sub>4</sub>-24h

**Table S1** Structural parameters of NiWO<sub>4</sub> different reaction time

| Sample                                      | NiWO <sub>4</sub> -8h | NiWO <sub>4</sub> -12h | NiWO <sub>4</sub> -18h | NiWO <sub>4</sub> -24h |
|---------------------------------------------|-----------------------|------------------------|------------------------|------------------------|
| Surface area/m <sup>2</sup> g <sup>-1</sup> | 6.7                   | 199.7                  | 85.39                  | 121.33                 |
| Volume/ml g <sup>-1</sup>                   | 0.032                 | 0.1394                 | 0.0557                 | 0.0821                 |

**Table S2.** Comparison of NiWO<sub>4</sub>-based materials reported in our work and the recent NiWO<sub>4</sub> nanostructures from literatures.

| Electrodes                                               | Capacitance                                        | Cycling number [Retention(%)]   | References (Year) |
|----------------------------------------------------------|----------------------------------------------------|---------------------------------|-------------------|
| NiWO <sub>4</sub> /rGO                                   | 1031.3 F g <sup>-1</sup> at 0.5 A g <sup>-1</sup>  | 5000, (99.24%)                  | [1] (2016)        |
| NiWO <sub>4</sub> @CoWO <sub>4</sub>                     | 196.7 C g <sup>-1</sup> at 0.5 A g <sup>-1</sup>   | 5000, higher than initial value | [2] (2016)        |
| NiWO <sub>4</sub> -CoWO <sub>4</sub> //AC                | 128.2C g <sup>-1</sup> at 0.5 A g <sup>-1</sup>    | 5000, (100%)                    | [2] (2016)        |
| NiWO <sub>4</sub>                                        | 586.2 F g <sup>-1</sup> at 0.5 A g <sup>-1</sup>   | 1000, (90%)                     | [3] (2013)        |
| NiWO <sub>4</sub> //AC                                   | 71.1 F g <sup>-1</sup> at 0.25 A g <sup>-1</sup>   | 5000, (91.4%)                   | [3] (2013)        |
| NiCo <sub>2</sub> O <sub>4</sub> @NiWO <sub>4</sub>      | 1384 F g <sup>-1</sup> at 1 A g <sup>-1</sup> □    | 6000, (87.6%)                   | [4] (2017)        |
| NiCo <sub>2</sub> O <sub>4</sub> @NiWO <sub>4</sub> //AC | 131.7 F g <sup>-1</sup> at 1 A g <sup>-1</sup>     | ---                             | [4] (2017)        |
| NiWO <sub>4</sub> /Ni/CF                                 | 792.2 F g <sup>-1</sup> at 1 A g <sup>-1</sup>     | 10,000, (174.8%)                | [5] (2016)        |
| NiWO <sub>3</sub> and NiWO <sub>4</sub>                  | 171.28 F g <sup>-1</sup> at 0.25 A g <sup>-1</sup> | ---                             | [5](2016)         |
| NiWO <sub>4</sub> /CF                                    | 1,190.2 F g <sup>-1</sup> at 2 A g <sup>-1</sup>   | 1000, (92%)                     | [6] (2015)        |
| CoWO <sub>4</sub> @NiWO <sub>4</sub>                     | 746 F g <sup>-1</sup> at 0.8 A g <sup>-1</sup>     | 2000, (91.3%)                   | [7] (2015)        |
| RGO/NiWO <sub>4</sub>                                    | 560 F g <sup>-1</sup> at 0.8 mV s <sup>-1</sup>    | 10000, (82 %)                   | [8] (2016)        |
| NiWO <sub>4</sub>                                        | 1190 F g <sup>-1</sup> at 0.5 A g <sup>-1</sup>    | 2000, (90.6%)                   | this work         |
| NiWO <sub>4</sub> //AC                                   | 160 F g <sup>-1</sup> at 0.5 A g <sup>-1</sup>     | 5000, (92.8%)                   | this work         |

[1] Xu X, Pei L, Yang Y, Shen J, Ye M. Facile synthesis of NiWO<sub>4</sub>/reduced graphene oxide nanocomposite with excellent capacitive performance for supercapacitors. *Journal of Alloys and Compounds*. 2016;654:23-31.

[2] Wang Y, Shen C, Niu L, Sun Z, Ruan F, Xu M, et al. High rate capability of mesoporous NiWO<sub>4</sub>-CoWO<sub>4</sub> nanocomposite as a positive material for hybrid supercapacitor. *Materials Chemistry and Physics*. 2016;182:394-401.

[3] Niu L, Li Z, Xu Y, Sun J, Hong W, Liu X, et al. Simple synthesis of amorphous NiWO<sub>4</sub> nanostructure and its application as a novel cathode material for asymmetric supercapacitors. *ACS applied materials & interfaces*. 2013;5:8044-52.

[4] Chen S, Yang G, Jia Y, Zheng H. Three-dimensional NiCo<sub>2</sub>O<sub>4</sub>@NiWO<sub>4</sub> core-shell nanowire arrays for high performance supercapacitors. *Journal of Materials Chemistry A*. 2017;5:1028-34.

[5] He Y, Wang L, Jia D, Zhao Z, Qiu J. NiWO<sub>4</sub> /Ni/Carbon Composite Fibres for Supercapacitors with Excellent Cycling Performance. *Electrochimica Acta*. 2016;222:446-54.

[6] Nagaraju G, Kakarla R, Cha SM, Yu JS. Highly flexible conductive fabrics with hierarchically nanostructured amorphous nickel tungsten tetraoxide for enhanced electrochemical energy storage. *Nano Research*. 2015;8:3749-63.

[7] Xu X, Gao J, Huang G, Qiu H, Wang Z, Wu J, et al. Fabrication of CoWO<sub>4</sub>@NiWO<sub>4</sub> nanocomposites with good supercapacitive performances. *Electrochimica Acta*. 2015;174:837-45.

[8] Xing X, Wang J. Reduced graphene oxide incorporated NiWO<sub>4</sub> for high-performance energy storage. *Journal of Materials Science: Materials in Electronics*. 2016;27:11613-22.
